# Supplementary material for: DNA Barcoding and ITS2 Secondary Structure Predictions in Taro (Colocasia esculenta L. Schott) from the North Eastern Hill Region of India
Source: MDPI journal article supplement (doi:10.3390/genes13122294), 2022-12-05
Supplement: s1 [file s1]

**Table S1.** List of the twenty taro genotypes used in the study.

| <b>Voucher ID</b> | <b>Genotypes</b> | <b>Place of Collection</b> | <b>Geographical location</b> |
|-------------------|------------------|----------------------------|------------------------------|
| RC MNP T1         | RCMC -1          | ICAR RC NEHR, Manipur      | 24° 50' N, 93° 55' E         |
| RC MNP T2         | RCMC -2          | ICAR RC NEHR, Manipur      | 24° 50' N, 93° 55' E         |
| RC MNP T3         | RCMC -5          | ICAR RC NEHR, Manipur      | 24° 50' N, 93° 55' E         |
| RC MNP T4         | RCMC -6          | ICAR RC NEHR, Manipur      | 24° 50' N, 93° 55' E         |
| RC MNP T5         | RCMC -10         | ICAR RC NEHR, Manipur      | 24° 50' N, 93° 55' E         |
| RC MNP T6         | DP-25            | RC CTCRI, Bhubaneswar      | 20° 14' N, 85° 47' E         |
| RC MNP T7         | Duradim          | Umroi Road, Meghalaya      | 25° 40' N, 91° 55' E         |
| RC MNP T8         | Jhankri          | RC CTCRI, Bhubaneswar      | 20° 14' N, 85° 47' E         |
| RC MNP T9         | Muktakeshi (MK)  | RC CTCRI, Bhubaneswar      | 20° 14' N, 85° 47' E         |
| RC MNP T10        | Topi             | RC CTCRI, Bhubaneswar      | 20° 14' N, 85° 47' E         |
| RC MNP T11        | Satasankha       | RC CTCRI, Bhubaneswar      | 20° 14' N, 85° 47' E         |
| RC MNP T12        | TSL              | RC CTCRI, Bhubaneswar      | 20° 14' N, 85° 47' E         |
| RC MNP T13        | P Chandel        | Chandel, Manipur           | 24° 19' N, 94° 01' E         |
| RC MNP T14        | R5JH10           | ICAR RC NEHR, Manipur      | 24° 50' N, 93° 55' E         |
| RC MNP T15        | R5MK             | ICAR RC NEHR, Manipur      | 24° 50' N, 93° 55' E         |
| RC MNP T16        | R1B9             | ICAR RC NEHR, Manipur      | 24° 50' N, 93° 55' E         |
| RC MNP T17        | PCT1             | ICAR RC NEHR, Manipur      | 24° 50' N, 93° 55' E         |
| RC MNP T18        | BBSL             | RC CTCRI, Bhubaneswar      | 20° 14' N, 85° 47' E         |
| RC MNP T19        | TOPI-1kR         | ICAR RC NEHR, Manipur      | 24° 50' N, 93° 55' E         |
| RC MNP T20        | BBSR             | RC CTCRI, Bhubaneswar      | 20° 14' N, 85° 47' E         |
